# Supplementary material for: Mo-doped boron nitride monolayer as a promising single-atom electrocatalyst for CO2 conversion
Source: PubMed Central journal article supplement (PMC6404464; doi:10.3762/bjnano.10.55), 2019-02-22
Supplement: Beilstein_J_Nanotechnol-10-540-s001.pdf [file Beilstein_J_Nanotechnol-10-540-s001.pdf]

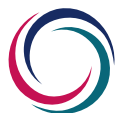

## Supporting Information

for

### **Mo-doped boron nitride monolayer as a promising single-atom electrocatalyst for CO<sub>2</sub> conversion**

Qianyi Cui, Gangqiang Qin, Weihua Wang, Lixiang Sun, Aijun Du and Qiao Sun

*Beilstein J. Nanotechnol.* **2019**, *10*, 540–548. [doi:10.3762/bjnano.10.55](https://doi.org/10.3762/bjnano.10.55)

### **A detailed description of the dataset**

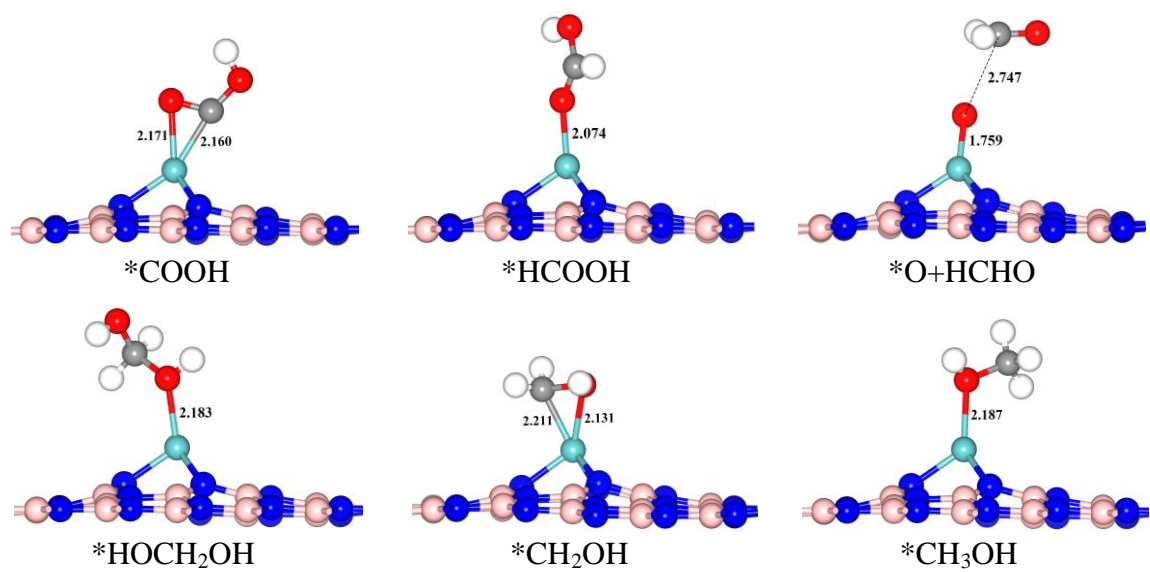

**Figure S1:** The configurations of the by-product in each step.

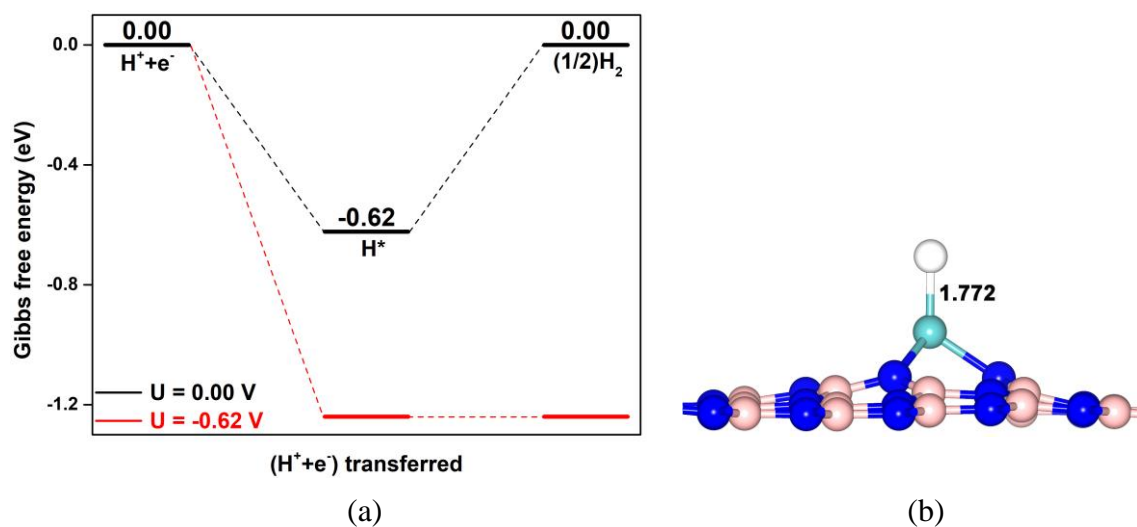

**Figure S2:** Gibbs free energy diagram of the HER on the surface of Mo-doped BN monolayer (a) and the structure of the H<sup>+</sup>/e<sup>-</sup> adsorption (b). The bond length is labeled in Å. \* represents chemisorbed species.

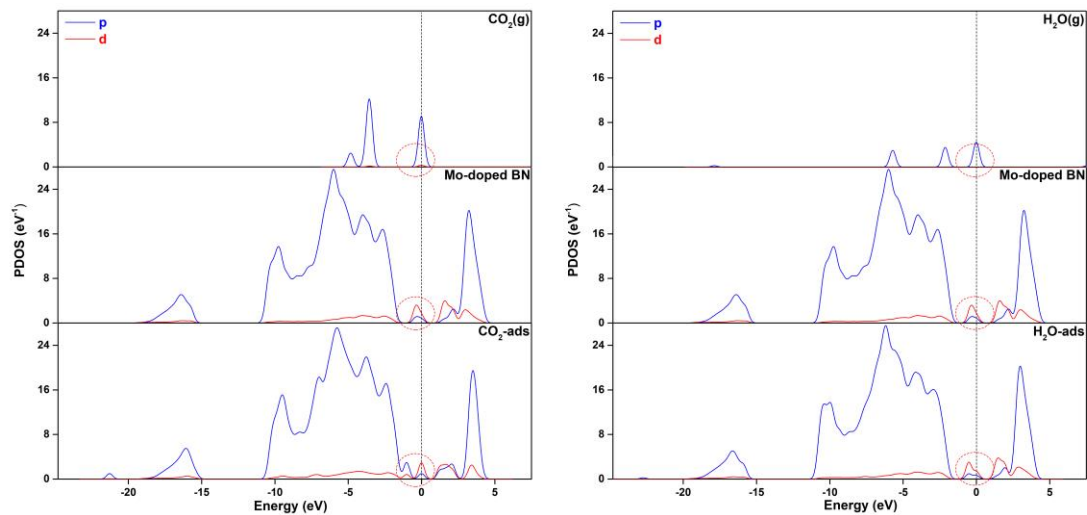

**Figure S3:** Projected density of states (PDOS) of the clean Mo-doped BN, free CO<sub>2</sub> and H<sub>2</sub>O molecule and their adsorbed species on the surface of Mo-doped BN monolayer. The black dashed line setting at zero indicates the Fermi level and oval dotted line in red denotes overlapping peaks of p- and d-orbital around Fermi level.

**Table S1:** Thermodynamic parameters in eV, for the free H<sub>2</sub>O, H<sub>2</sub>, CO<sub>2</sub> and CH<sub>4</sub> gas molecules at 298.15 K and 101325 Pa [1].

| Species              | -TS   | ZPE  |
|----------------------|-------|------|
| H <sub>2</sub> O (g) | -0.55 | 0.56 |
| H <sub>2</sub> (g)   | -0.39 | 0.27 |
| CO <sub>2</sub> (g)  | -0.64 | 0.27 |
| CH <sub>4</sub> (g)  | -1.20 | 1.20 |

The entropy (S) can be expressed as the sum of the translational, rotational, vibrational and electronic entropy. At fundamental electronic level:  $S_e \approx 0$ . So, the entropy calculation as the expression:  $S = S_t + S_r + S_v$

**Table S2:** The values of adsorption energies in eV, corresponding to the isolated CO<sub>2</sub>, H<sub>2</sub>O and N<sub>2</sub> species on the TMs supported by the boron defective BN monolayer.

| Metal | CO <sub>2</sub> $E_{ads}$ | H <sub>2</sub> O $E_{ads}$ |
|-------|---------------------------|----------------------------|
| Sc    | -0.27                     | -0.83                      |
| Ti    | -3.24                     | -3.68                      |
| V     | -2.93                     | -3.30                      |
| Cr    | -3.04                     | -3.58                      |
| Mn    | -0.67                     | -1.43                      |
| Fe    | -0.35                     | -0.96                      |
| Co    | -0.27                     | -0.81                      |
| Ni    | -0.34                     | -0.86                      |
| Cu    | -1.36                     | -1.88                      |
| Zn    | -0.38                     | -0.78                      |
| Mo    | -1.09                     | -0.72                      |
| Ru    | -0.41                     | -0.79                      |
| Rh    | -0.33                     | -0.77                      |
| Pd    | -0.28                     | -0.74                      |
| Ag    | -0.24                     | -0.49                      |

For the adsorption energies,  $\Delta E_{ads} = E_{gas-catal} - E_{gas} - E_{catal}$ , where  $E_{gas-catal}$  represents the energy of the whole absorbed structure,  $E_{gas}$  represents the energy of free gas molecules and  $E_{catal}$  represents the energy of clean SACs surface, respectively.

**Table S3:** The properties of the most stable CO<sub>2</sub> absorbed structure includes proximal distance between CO<sub>2</sub> and TM atoms, O-C bond length in eV, O-C-O angle in° and charge transfer of CO<sub>2</sub> in *e*.

| Metal | CO <sub>2</sub> -M distance (Å) | O-C-O Angle <sup>β</sup> | O1-C bond length (Å) | O2-C bond length (Å) | Charge transfer (e) |
|-------|---------------------------------|--------------------------|----------------------|----------------------|---------------------|
| Sc    | 2.350                           | 179.8                    | 1.177                | 1.166                | 0.073               |
| Ti    | 1.975                           | 130.6                    | 1.299                | 1.214                | -0.583              |
| V     | 2.026                           | 135.4                    | 1.293                | 1.224                | -0.461              |
| Cr    | 1.959                           | 141.2                    | 1.284                | 1.205                | -0.251              |
| Mn    | 1.999                           | 179.6                    | 1.177                | 1.166                | 0.151               |
| Fe    | 2.217                           | 178.9                    | 1.185                | 1.166                | 0.093               |
| Co    | 2.309                           | 178.8                    | 1.182                | 1.168                | 0.076               |
| Ni    | 2.229                           | 179.0                    | 1.180                | 1.168                | 0.089               |
| Cu    | 2.373                           | 179.8                    | 1.176                | 1.170                | 0.070               |
| Zn    | 2.436                           | 179.5                    | 1.183                | 1.168                | 0.067               |
| Mo    | 2.092                           | 135.7                    | 1.309                | 1.215                | -0.482              |
| Ru    | 2.118                           | 148.3                    | 1.242                | 1.209                | -0.243              |
| Rh    | 2.399                           | 179.3                    | 1.179                | 1.169                | 0.092               |
| Pd    | 2.346                           | 179.2                    | 1.181                | 1.168                | 0.102               |
| Ag    | 2.646                           | 179.9                    | 1.176                | 1.171                | 0.056               |

**Table S4:** The properties of the most stable H<sub>2</sub>O absorbed structure includes proximal distance between H<sub>2</sub>O and TM atoms, H-O-H bond length in eV, H-O-H angle in° and charge transfer of H<sub>2</sub>O in *e*.

| Metal | H <sub>2</sub> O-M distance (Å) | H-O-H Angle <sup>β</sup> | H1-O bond length (Å) | H2-O bond length (Å) | Charge transfer (e) |
|-------|---------------------------------|--------------------------|----------------------|----------------------|---------------------|
| Sc    | 2.245                           | 105.40                   | 0.976                | 0.976                | 0.140               |
| Ti    | 2.143                           | 105.77                   | 0.976                | 0.976                | 0.171               |
| V     | 2.088                           | 105.78                   | 0.977                | 0.977                | 0.202               |
| Cr    | 2.140                           | 105.45                   | 0.976                | 0.976                | 0.195               |
| Mn    | 1.982                           | 105.45                   | 0.978                | 0.979                | 0.256               |
| Fe    | 2.031                           | 105.81                   | 0.977                | 0.977                | 0.222               |
| Co    | 2.035                           | 105.43                   | 0.978                | 0.978                | 0.235               |
| Ni    | 2.012                           | 105.63                   | 0.978                | 0.978                | 0.236               |
| Cu    | 2.096                           | 104.81                   | 0.977                | 0.976                | 0.205               |
| Zn    | 2.081                           | 104.73                   | 0.977                | 0.977                | 0.217               |
| Mo    | 2.332                           | 104.67                   | 0.976                | 0.976                | 0.156               |
| Ru    | 2.220                           | 105.11                   | 0.977                | 0.977                | 0.198               |
| Rh    | 2.228                           | 104.28                   | 0.977                | 0.977                | 0.209               |
| Pd    | 2.208                           | 104.43                   | 0.978                | 0.978                | 0.228               |
| Ag    | 2.284                           | 104.25                   | 0.976                | 0.976                | 0.192               |

**Table S5:** Gibbs free energy variation at 298.15 K in eV whose ZPE correction has been applied, and charge transfer in e, corresponding to CO<sub>2</sub> and different intermediates along the CO<sub>2</sub> reduction pathway by the Mo-doped BN monolayer. \* refer to chemisorbed species. The total Gibbs free energy of the isolated CO<sub>2</sub> molecule and Mo-doped BN monolayer is defined as the zero.

| species               | Gibbs free energy variation (eV) | Charge transfer (e) |
|-----------------------|----------------------------------|---------------------|
| *CO <sub>2</sub>      | -0.83                            | -0.482              |
| *OCHO                 | -1.35                            | -0.581              |
| *COOH                 | -0.52                            | -0.251              |
| *OCH <sub>2</sub> O   | -1.64                            | -0.699              |
| *HCOOH                | -0.63                            | 0.003               |
| *O+HCHO               | -0.79                            | -0.026              |
| *HOCH <sub>2</sub> O  | -2.17                            | -0.313              |
| *CH <sub>2</sub> O    | -1.89                            | -0.304              |
| *HOCH <sub>2</sub> OH | -0.68                            | 0.193               |
| *CH <sub>3</sub> O    | -2.20                            | -0.323              |
| *CH <sub>2</sub> OH   | -1.05                            | 0.014               |
| *CH <sub>3</sub> OH   | -1.42                            | 0.196               |
| *O                    | -2.64                            | -0.682              |
| *OH                   | -2.74                            | -0.406              |
| *H <sub>2</sub> O     | -2.29                            | -0.174              |

**Table S6:** Variation of Mulliken charge of the three moieties (shown in Fig. 5b) of the catalyst.

| Reaction step | Moiety 1 | Moiety 2 | Moiety 3 |
|---------------|----------|----------|----------|
| 0             | -0.482   | -0.018   | 0.500    |
| 1             | -0.581   | 0.110    | 0.467    |
| 2             | -0.699   | 0.071    | 0.626    |
| 3             | -0.313   | 0.058    | 0.253    |
| 4             | -0.304   | 0.086    | 0.215    |
| 5             | -0.323   | 0.063    | 0.253    |
| 6             | -0.682   | 0.118    | 0.559    |
| 7             | -0.406   | 0.116    | 0.286    |
| 8             | 0.156    | 0.029    | -0.188   |

**Table S7:** The valence electronic configurations of the transition metal by method of semi-core pseudopotentials (DSPP).

| Element | Valence electronic structure | Element | Valence electronic structure |
|---------|------------------------------|---------|------------------------------|
| Sc      | $3s^2 3p^6 3d^1 4s^2$        | Cu      | $3s^2 3p^6 3d^{10} 4s^1$     |
| Ti      | $3s^2 3p^6 3d^2 4s^2$        | Zn      | $3s^2 3p^6 3d^{10} 4s^2$     |
| V       | $3s^2 3p^6 3d^3 4s^2$        | Mo      | $4s^2 4p^6 4d^5 5s^1$        |
| Cr      | $3s^2 3p^6 3d^5 4s^1$        | Ru      | $4s^2 4p^6 4d^6 5s^2$        |
| Mn      | $3s^2 3p^6 3d^5 4s^2$        | Rh      | $4s^2 4p^6 4d^7 5s^2$        |
| Fe      | $3s^2 3p^6 3d^6 4s^2$        | Pd      | $4s^2 4p^6 4d^8 5s^2$        |
| Co      | $3s^2 3p^6 3d^7 4s^2$        | Ag      | $4s^2 4p^6 4d^{10} 5s^1$     |
| Ni      | $3s^2 3p^6 3d^8 4s^2$        |         |                              |

## References

- [1] Computational chemistry comparison and benchmark database. <https://cccbdb.Nist.Gov/>, in, 2005.
